# Supplementary material for: Diagnostic and therapeutic quality and management capacity for coronary heart disease in Shanghai community medical institutions: a cross-sectional study
Source: Research Square preprint supplement (doi:10.21203/rs.3.rs-6709576/v1), 2025-05-29
Supplement: Supplementary file 2 [file 2684f28c3ce6bdda5743fa32.docx]

**Supplementary file 2. Classification criteria for urban and suburban**

**community health service centers in Shanghai**

In this study, the urban-suburban classification of Community Health Service Centers (CHSCs) was primarily based on the provisions outlined in the Shanghai Municipal High-Level Evaluation Application Notice for Community Health Services (Hu Wei Ping Shen [2018] No. 2)[1]. Specific classifications were defined as follows:

1. Suburban areas encompass all CHSCs in Chongming District, Fengxian District, Qingpu District, and Jinshan District.
2. The following towns in Songjiang District are classified as suburban areas: Dongjing Town, Jiuting Town, Yexie Town, Shihudang Town, Chedun Town, Xinqiao Town, Xiaokunshan Town, Sigang Town, Xinbang Town, Sheshan Town, and Sijing Town.
3. The following towns in Pudong New Area are classified as suburban areas: Luchaogang, Lingqiao, Huanglou, Liuzao, Jiangzhen, Airport, Caolu, Xuanqiao, Heqing, Shuyuan, Wanxiang, Laogang, Datuan, Nicheng, Sunqiao, Tangzhen, Wanggang, Zhuqiao, Gaodong, Hangtou, Huinan, Xinchang, Chuansha, Hantou, and Hesha.

All CHSCs not explicitly listed as suburban were categorized as urban areas.

**Reference:**

[1] Shanghai Municipal Health Commission, Shanghai Municipal Commission of Development and Reform, et al. (2020-8-21). Notice on the issuance of the "Guidelines for the functions and construction of community health service institutions in Shanghai" [EB/OL]. https://wsjkw.sh.gov.cn/zcjd/20200821/2eb234146ed84ad5b804e7f6a97ee402.html
